# Supplementary material
Source: PubMed Central journal article supplement (PMC4757583)
Supplement: JZUSB17-0136ESM.pdf [file JZUSB17-0136ESM.pdf]

## Supplemental Information

### Immunofluorescence

PB and PGC-1 $\alpha$  cells were seeded into 12 wells plate, the plate had put the corresponding size glass piece before, adding DMEM medium and placing at 37 °C in 5% CO<sub>2</sub>. After 24 h, medium was removed and cells were fixed with 4% methanal for 10 min and washed 2 times with PBS, CyclinB1, and CyclinD1 antibodies (at 1:100 dilution) were incubated for 2 h at 37 °C, and second antibodies (FITC or CY3 labeled, at 1:200 dilution) were incubated for 1 h, respectively. After 2 times with PBS, the cell climbing piece were got out and pasted in glass slide. Immunofluorescence images were photoed with confocal microscopy (Leica, Berlin, Germany) and quantified using ImageJ software.

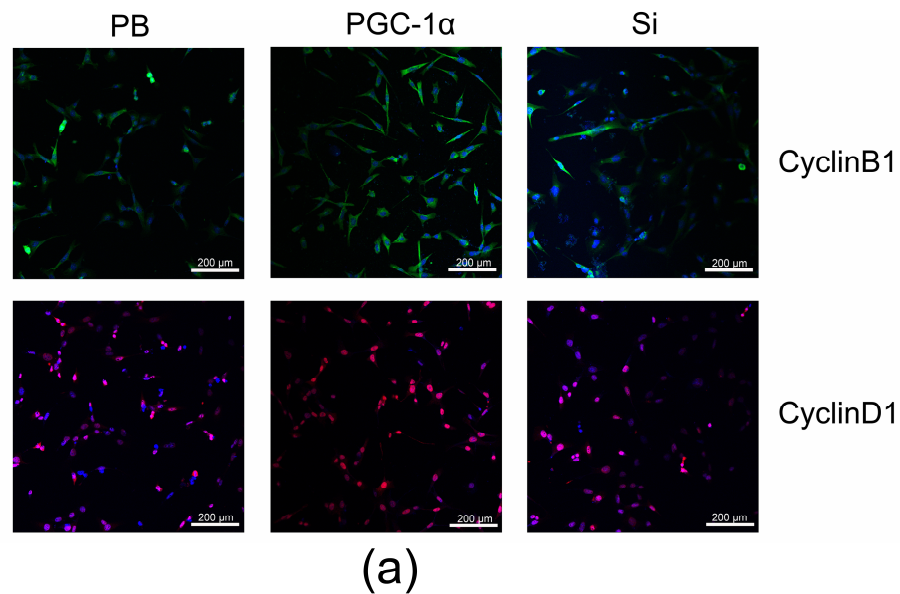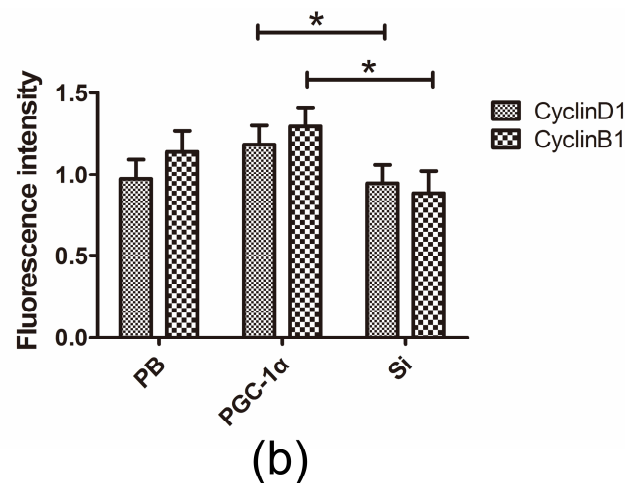

**Fig. S1 Immunofluorescence picture of CyclinD1 and CyclinB1 in PB, PGC-1 $\alpha$ , and Si cells**  
(a) The expression of CyclinD1 and CyclinB1 in PB, PGC-1 $\alpha$ , and Si cells was detected by immunofluorescence; (b) semi-quantification of CyclinB1 and CyclinD1 proteins expression in (a)

### Mitochondrial content measurement

Cells were collected and resuspended in PBS at  $1 \times 10^5$  cells/ml, and incubated with 100 nmol/L MitoTracker<sup>®</sup> Green (Invitrogen, Eugene, OR, USA) for 1 h at 37 °C. Untreated cells served as negative controls. Green fluorescence was detected using BD Accuri C6 flow cytometer (BD Biosciences, San Jose, CA) (Corena *et al.*, 2014).

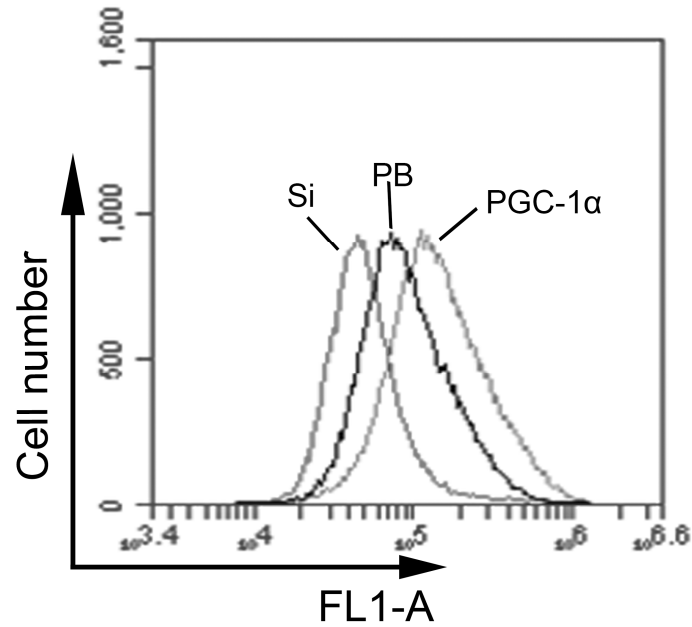

**Fig. S2** Mitochondrial content indicated by MitoTracker Green fluorescence (analyzed by flow cytometry).

## Treatment by antimycin A

When cells reached 70% confluence, they were incubated with antimycin A (Sigma, St Louis, USA), an inhibitor of electron transport chain complex III. Cells were treated for 24 h at a final concentration of 0.5 mmol/L (Quinzii *et al.*, 2010). Effects of the treatment on protein expression were determined using Western blot.

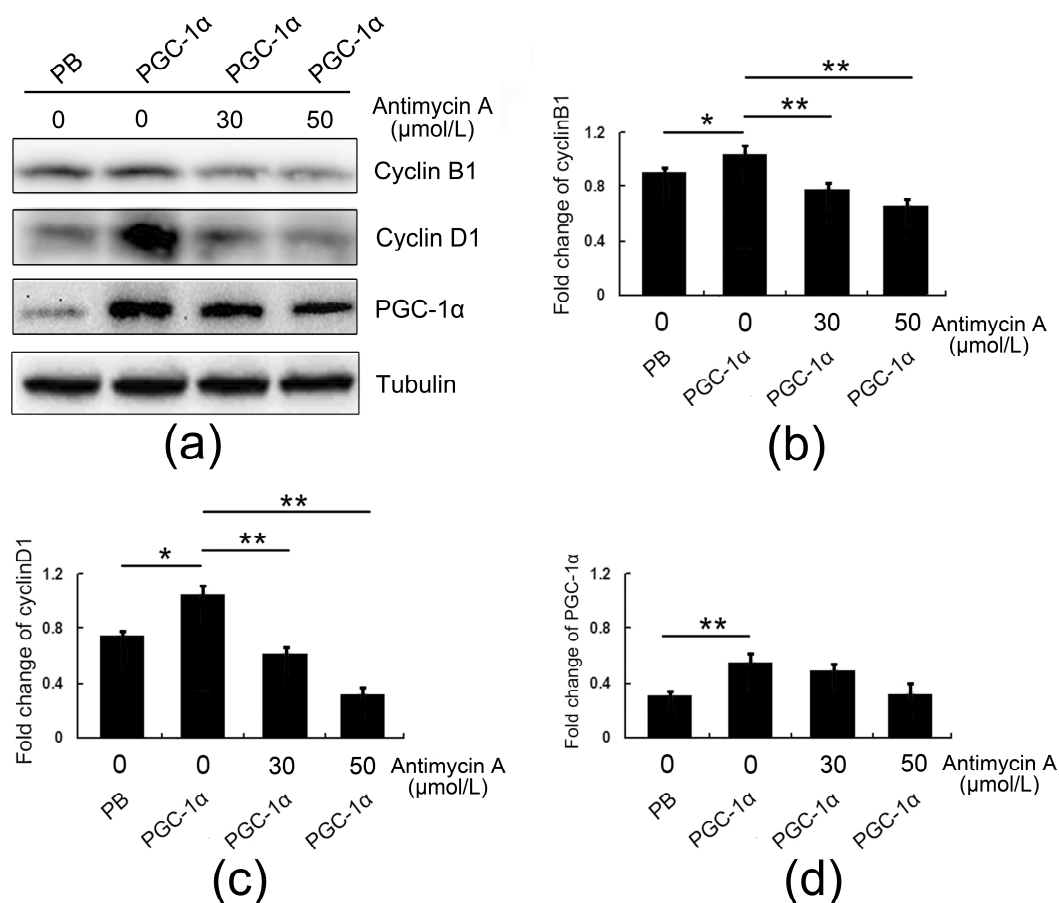

**Fig. S3 Change of CyclinD1/B1 levels in CH1-PGC-1α after 24 h of antimycin A treatment**  
 (a) Protein expression of cyclinB1, cyclinD1, and PGC-1α. PGC-1α cells were treated with antimycin A (30 and 50 μmol/L). PB was used as a control for PGC-1α. Semi-quantification of CyclinB1 (b), CyclinD1 (c), and PGC-1α (d) in (a)

## Supplemental references

- Corena, M.M., Walss, B.C., Oliveros, A., *et al.*, 2013. New model of action for mood stabilizers: phosphoproteome from rat pre-frontal cortex synaptoneurosomal preparations. *PLoS ONE*, **8**(5):e52147.  
<http://dx.doi.org/10.1371/journal.pone.0052147>
- Quinzii, C.M., López, L.C., Gilkerson, R.W., *et al.*, 2010. Reactive oxygen species, oxidative stress, and cell death correlate with level of CoQ10 deficiency. *FASEB J.*, **24**(10):3733-3743.  
<http://dx.doi.org/10.1096/fj.09-152728>
